# Supplementary material for: Advanced asymmetrical supercapacitors based on graphene hybrid materials
Source: Springer Nature journal article supplement (doi:10.1007/s12274-011-0129-6), 2011-04-12
Supplement: 12274_2011_129_MOESM1_ESM.pdf [file 12274_2011_129_MOESM1_ESM.pdf]

## Electronic Supplementary Material

# Advanced Asymmetrical Supercapacitors Based on Graphene Hybrid Materials

Hailiang Wang, Yongye Liang, Tissaphern Mirfakhrai, Zhuo Chen, Hernan Sanchez Casalongue, and Hongjie Dai (✉)

Department of Chemistry, Stanford University, Stanford, CA 94305, USA

Supporting information to DOI 10.1007/s12274-011-0129-6

### Synthesis of graphene hybrid materials

Synthesis of Ni(OH)<sub>2</sub>/graphene: Typically, ~5 mg of graphene sheets (GS, prepared following Refs. [22, 23, 25, 35] in the main text) was dispersed in 20 mL of anhydrous *N,N*-dimethylformamide (DMF). The suspension was heated to 80 °C, after which 2 mL of 0.2 mol/L nickel acetate (Ni(OAc)<sub>2</sub>) aqueous solution was injected in. The mixture was kept at 80 °C with stirring for 1 h. After that, the intermediate product was transferred to ~20 mL of water and sealed in 40 mL Teflon-lined stainless steel autoclaves for hydrothermal treatment at 180 °C for 10 h.

Synthesis of RuO<sub>2</sub>/graphene: ~1 mg of GS was dispersed in 1 mL of DMF and 9 mL of H<sub>2</sub>O. After adding ~10 mg of RuCl<sub>3</sub>, the mixture was bath-sonicated for ~20 min to make a homogeneous suspension. The suspension was then heated at 80 °C with stirring for 1 h. After that, the intermediate product was transferred to ~10 mL of water and sealed in 40 mL Teflon-lined stainless steel autoclaves for hydrothermal treatment at 180 °C for 10 h.

### Supercapacitor electrode preparation

To prepare a RuO<sub>2</sub>/graphene electrode, ~1 mg of hybrid material was first mixed with polytetrafluoroethylene (from 60 wt% water suspension, Aldrich) in a ratio of 100:2 by mass, and then dispersed in ethanol. Then the suspension was drop-dried into a 1 cm × 1 cm Ni foam (2 mm thick, 100 pores per inch (ppi), 95% porosity, Marketech) at 80 °C followed by a post-baking at 200 °C for 1 h. The foam with sample loaded was compressed before measurement. Control experiments confirmed that the capacitance contribution from the Ni foam was negligible.

The Ni(OH)<sub>2</sub>/graphene electrode was prepared in the same way as the RuO<sub>2</sub>/graphene electrode except that the Ni foam was coated by carbon (from decomposition of CH<sub>4</sub> at 800 °C) before deposition of Ni(OH)<sub>2</sub>/graphene to prevent the Ni foam being in direct contact with the KOH electrolyte. Control experiments confirmed that the capacitance contribution from carbon-coated Ni foam was negligible (less than 2%) for our Ni(OH)<sub>2</sub>/graphene electrodes.

To prepare an RGO electrode, ~3 mg of GO (made by following Refs. [34–36] in the main text, and then degassed at 120 °C in a Micromeritics ASAP 2010 surface area and porosity analyzer) was dispersed in ~6 mL of ethanol and deposited into a 3 cm × 1 cm Ni foam at 80 °C. The sample was then treated by hydrazine vapor for 72 h to reduce the GO.

Address correspondence to hdai@stanford.edu

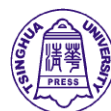

### Electrochemical measurements

Electrochemical measurements were carried out in a beaker cell with 1 mol/L KOH aqueous solution as the electrolyte. In a three-electrode configuration, a Ag/AgCl electrode filled with 1 mol/L NaCl was used as the reference electrode and a platinum wire was used as the counter electrode. In a two-electrode configuration, the reference electrode lead was connected to the counter electrode lead. The Ni(OH)<sub>2</sub>/graphene electrode was pre-scanned against the Ag/AgCl reference electrode at 40 mV/s for 200 cycles to stabilize the capacitance before further measurements. Specific capacitance values were calculated from the CV curves using the following equation:

$$C = \frac{\int Idt}{m\Delta V}$$

where  $I$  is the oxidation or reduction current,  $dt$  is the time differential,  $m$  indicates the mass of the electrode materials, and  $\Delta V$  indicates the voltage range of one sweep segment. Specific capacitances were also calculated from the galvanostatic charge and discharge curves, using the following equation:

$$C = \frac{I\Delta t}{m\Delta V}$$

where  $I$  is the charge or discharge current,  $\Delta t$  is the time for a full charge or discharge,  $m$  indicates the mass of the electrode materials, and  $\Delta V$  represents the voltage range. Energy density ( $d_e$ ) was derived from the CV curves using the following equation:

$$d_e = \frac{1}{2}C(\Delta V)^2$$

where  $C$  is the specific capacitance of the supercapacitor, and  $\Delta V$  is the voltage range of one sweep segment. Power density ( $d_p$ ) was calculated from the following equation:

$$d_p = \frac{d_e}{\Delta t}$$

where  $d_e$  is the energy density, and  $\Delta t$  is the time for a sweep segment. Energy and power densities could also be derived from galvanostatic charge and discharge measurements using

$$d_e = \frac{\int IVdt}{m}$$

and

$$d_p = \frac{d_e}{\Delta t}$$

where  $I$  is the charge or discharge current,  $V$  is the voltage of the supercapacitor,  $dt$  is the time differential,  $m$  indicates the mass of the electrode materials, and  $\Delta t$  is the time for a full charge or discharge.

## Supplementary Figures

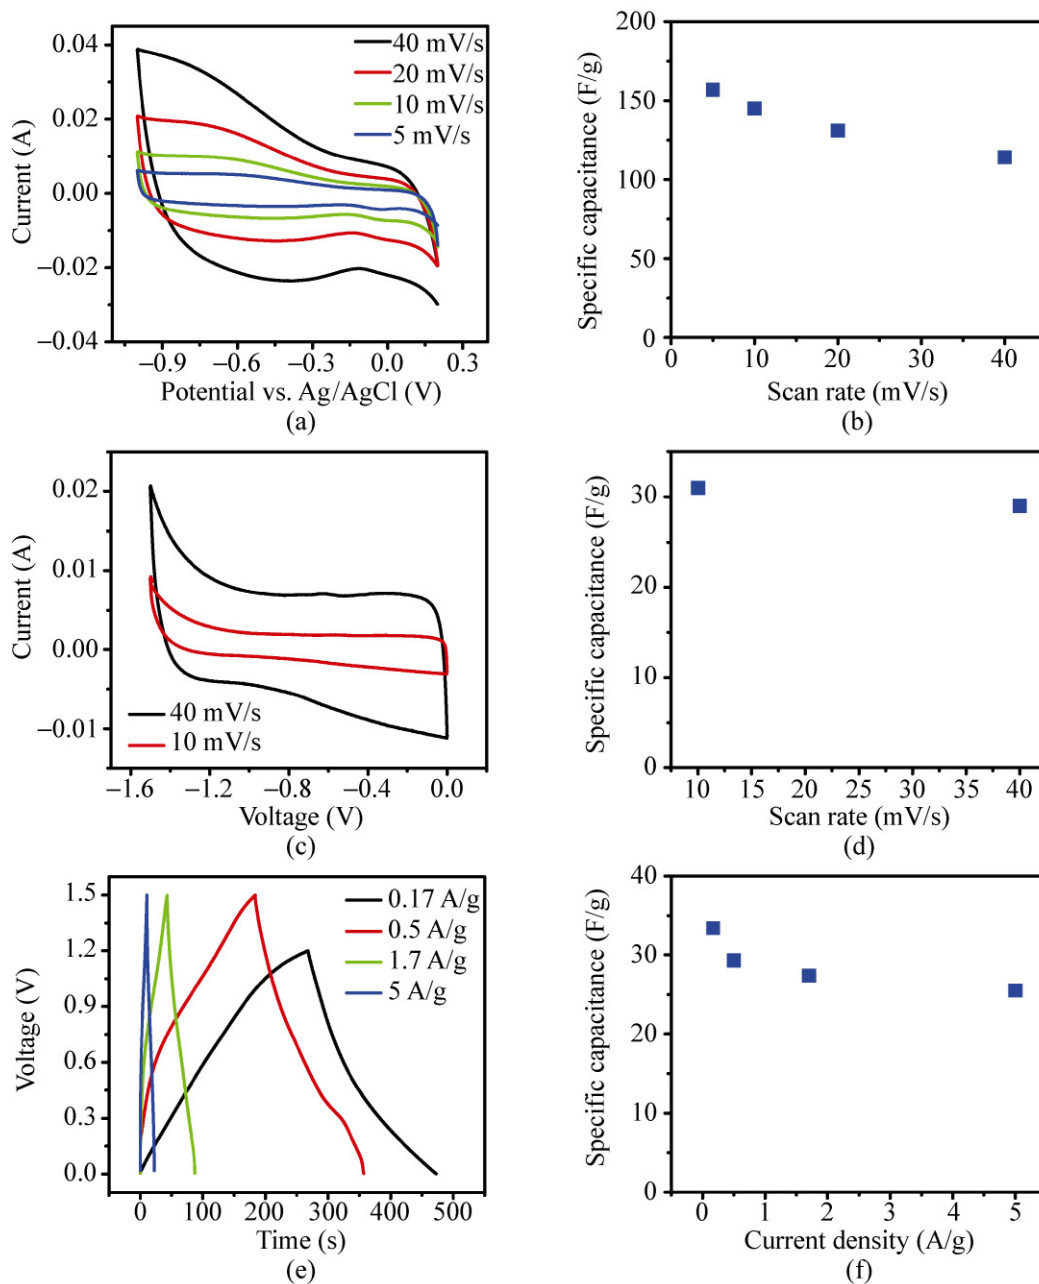

**Figure S-1** Symmetrical RGO supercapacitor: (a) CV curves of a RGO electrode at various scan rates against a Ag/AgCl reference electrode; (b) average specific capacitance of the RGO electrode at various scan rates; (c) CV curves of the symmetrical RGO supercapacitor at various scan rates; (d) average specific capacitance of the RGO supercapacitor at various scan rates; (e) galvanostatic charge and discharge curves of the RGO supercapacitor at various current densities; (f) average specific capacitance of the RGO supercapacitor at various discharge current densities

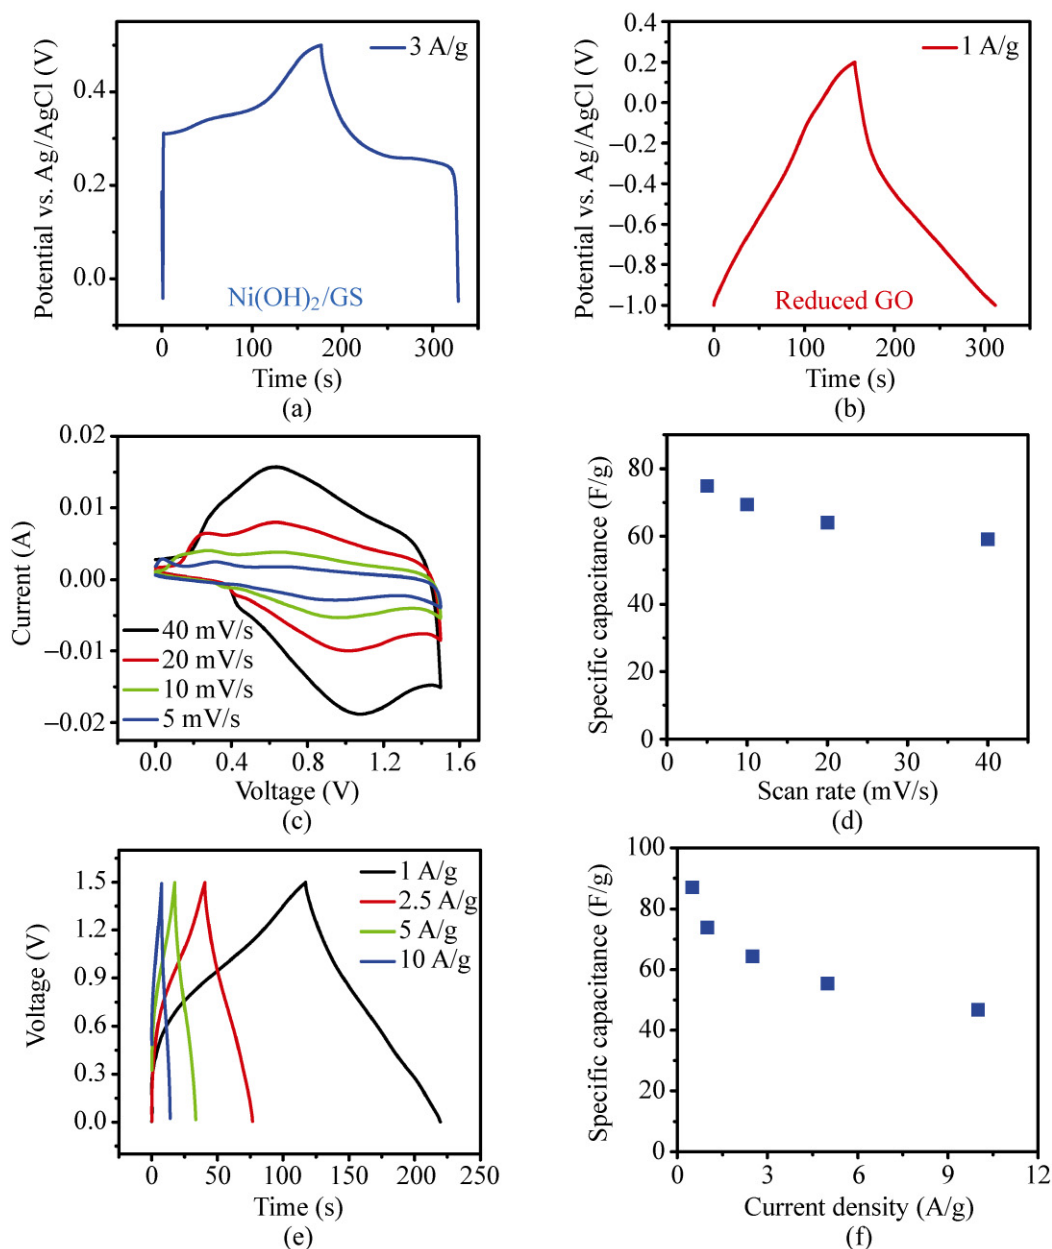

**Figure S-2** Asymmetrical supercapacitor made of Ni(OH)<sub>2</sub>/graphene and RGO: (a) charge and discharge curve of the Ni(OH)<sub>2</sub>/graphene electrode at 3 A/g against a Ag/AgCl reference electrode; (b) charge and discharge curve of the RGO electrode at 1 A/g against a Ag/AgCl reference electrode; (c) CV curves of the asymmetrical supercapacitor at various scan rates; (d) average specific capacitance of the asymmetrical supercapacitor at various scan rates; (e) galvanostatic charge and discharge curves of the asymmetrical supercapacitor at various current densities; (f) average specific capacitance of the asymmetrical supercapacitor at various discharge current densities

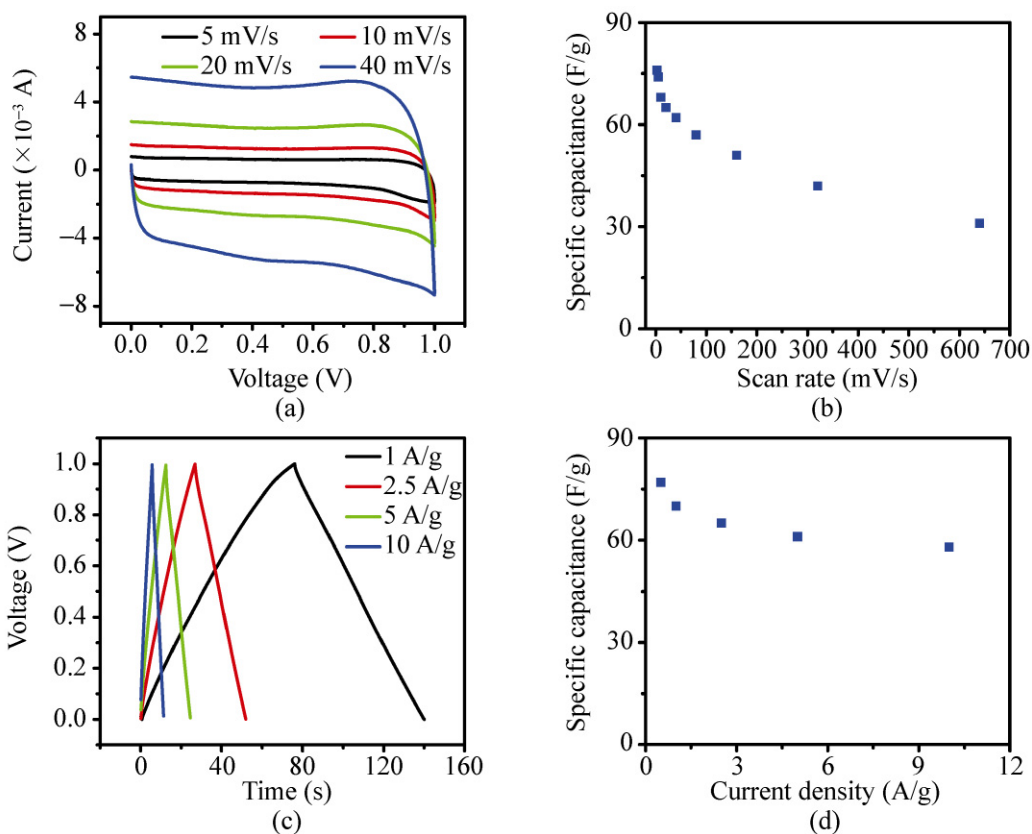

**Figure S-3** Symmetrical RuO<sub>2</sub> supercapacitor: (a) CV curves of the symmetrical RuO<sub>2</sub> supercapacitor at various scan rates; (b) average specific capacitance of the RuO<sub>2</sub> supercapacitor at various scan rates; (c) galvanostatic charge and discharge curves of the RuO<sub>2</sub> supercapacitor at various current densities; (d) average specific capacitance of the RuO<sub>2</sub> supercapacitor at various discharge current densities
